# Supplementary material for: Signal-induced enhancer activation requires Ku70 to read topoisomerase1–DNA covalent complexes
Source: PubMed Central journal article supplement (PMC9935399; doi:10.1038/s41594-022-00883-8), 2023-02-06
Supplement: 41594_2022_883_MOESM1_ESM.pdf [file 41594_2022_883_MOESM1_ESM.pdf]

## Reporting Summary

Nature Portfolio wishes to improve the reproducibility of the work that we publish. This form provides structure for consistency and transparency in reporting. For further information on Nature Portfolio policies, see our [Editorial Policies](#) and the [Editorial Policy Checklist](#).

### Statistics

For all statistical analyses, confirm that the following items are present in the figure legend, table legend, main text, or Methods section.

n/a Confirmed

- The exact sample size ( $n$ ) for each experimental group/condition, given as a discrete number and unit of measurement
- A statement on whether measurements were taken from distinct samples or whether the same sample was measured repeatedly
- The statistical test(s) used AND whether they are one- or two-sided  
*Only common tests should be described solely by name; describe more complex techniques in the Methods section.*
- A description of all covariates tested
- A description of any assumptions or corrections, such as tests of normality and adjustment for multiple comparisons
- A full description of the statistical parameters including central tendency (e.g. means) or other basic estimates (e.g. regression coefficient) AND variation (e.g. standard deviation) or associated estimates of uncertainty (e.g. confidence intervals)
- For null hypothesis testing, the test statistic (e.g.  $F$ ,  $t$ ,  $r$ ) with confidence intervals, effect sizes, degrees of freedom and  $P$  value noted  
*Give  $P$  values as exact values whenever suitable.*
- For Bayesian analysis, information on the choice of priors and Markov chain Monte Carlo settings
- For hierarchical and complex designs, identification of the appropriate level for tests and full reporting of outcomes
- Estimates of effect sizes (e.g. Cohen's  $d$ , Pearson's  $r$ ), indicating how they were calculated

*Our web collection on [statistics for biologists](#) contains articles on many of the points above.*

### Software and code

Policy information about [availability of computer code](#)

#### Data collection

For all high throughput sequencing, the extracted DNA libraries were sequenced with Illumina HiSeq 4000 or NovaSeq 6000 system according to the manufacturer's instructions. And DNA sequences generated by the Illumina Pipeline were aligned to the human genome (hg38) or mouse genome (mm10) assembly using Bowtie2. The data were visualized by preparing custom tracks on the University of California, Santa Cruz (UCSC) genome browser using HOMER software package. Clustering plots for normalized tag densities at each genomic region were generated using HOMER and then clustered using Gene Cluster 3.0 and visualized using Java TreeView. EdgeR was used to compute the significance of the differential gene expression. Sequence logos were generated using WebLOGO. Gene ontology analysis was performed with Metascape. The overlaps between sites identified in ChIP-seq for DNA-binding proteins and TOP1cc signals were calculated using BEDTools.

#### Data analysis

Analytical programs used in this paper are provided in the Methods section

For manuscripts utilizing custom algorithms or software that are central to the research but not yet described in published literature, software must be made available to editors and reviewers. We strongly encourage code deposition in a community repository (e.g. GitHub). See the Nature Portfolio [guidelines for submitting code & software](#) for further information.

## Data

Policy information about [availability of data](#)

All manuscripts must include a [data availability statement](#). This statement should provide the following information, where applicable:

- Accession codes, unique identifiers, or web links for publicly available datasets
- A description of any restrictions on data availability
- For clinical datasets or third party data, please ensure that the statement adheres to our [policy](#)

We used some published ChIP-seq data from the Gene Expression Omnibus database for DNA-PKCs under accession number GSE60270, and GRO-seq data for MCF7 with 1hr E2 treatment under accession number GSE45822. Most data are available in the main text or the supplementary materials. Whole genome sequencing datasets have been deposited to NCBI GSE135808.

## Field-specific reporting

Please select the one below that is the best fit for your research. If you are not sure, read the appropriate sections before making your selection.

- Life sciences  Behavioural & social sciences  Ecological, evolutionary & environmental sciences

For a reference copy of the document with all sections, see [nature.com/documents/nr-reporting-summary-flat.pdf](https://nature.com/documents/nr-reporting-summary-flat.pdf)

## Life sciences study design

All studies must disclose on these points even when the disclosure is negative.

|                 |                                                                                                                                                                                                                                                                                                                                                                                                                          |
|-----------------|--------------------------------------------------------------------------------------------------------------------------------------------------------------------------------------------------------------------------------------------------------------------------------------------------------------------------------------------------------------------------------------------------------------------------|
| Sample size     | For each experiment, the desired effect representing a difference between the populations of samples under study will be computed by estimating the mean and the variance of the distributions from an initial set of 3 biological replicates.                                                                                                                                                                           |
| Data exclusions | No data was excluded.                                                                                                                                                                                                                                                                                                                                                                                                    |
| Replication     | All genome-wide experiments were replicated at least twice; and non genome-wide experiments were replicated at least 3 times.                                                                                                                                                                                                                                                                                            |
| Randomization   | Random genomic regions were selected to present the distribution of Top1cc in the genome.                                                                                                                                                                                                                                                                                                                                |
| Blinding        | All the libraries preparation for the ChIP-seq, PRO-seq, CUT&RUN assays were performed with different people to make sure the blindness. For other qPCR and Western blots experiments, the knock-down experiments and final PCR/western blot were performed by different people to make sure the blindness. For cortical neurons, the tissue preparation, library preparation were also performed with different people. |

## Reporting for specific materials, systems and methods

We require information from authors about some types of materials, experimental systems and methods used in many studies. Here, indicate whether each material, system or method listed is relevant to your study. If you are not sure if a list item applies to your research, read the appropriate section before selecting a response.

### Materials & experimental systems

| n/a                                 | Involved in the study                                     |
|-------------------------------------|-----------------------------------------------------------|
| <input type="checkbox"/>            | <input checked="" type="checkbox"/> Antibodies            |
| <input type="checkbox"/>            | <input checked="" type="checkbox"/> Eukaryotic cell lines |
| <input checked="" type="checkbox"/> | <input type="checkbox"/> Palaeontology and archaeology    |
| <input checked="" type="checkbox"/> | <input type="checkbox"/> Animals and other organisms      |
| <input checked="" type="checkbox"/> | <input type="checkbox"/> Human research participants      |
| <input checked="" type="checkbox"/> | <input type="checkbox"/> Clinical data                    |
| <input checked="" type="checkbox"/> | <input type="checkbox"/> Dual use research of concern     |

### Methods

| n/a                                 | Involved in the study                           |
|-------------------------------------|-------------------------------------------------|
| <input type="checkbox"/>            | <input checked="" type="checkbox"/> ChIP-seq    |
| <input checked="" type="checkbox"/> | <input type="checkbox"/> Flow cytometry         |
| <input checked="" type="checkbox"/> | <input type="checkbox"/> MRI-based neuroimaging |

## Antibodies

Antibodies used

ER $\alpha$  (HC20) Santa Cruz Biotechnology sc-543 (Lot# I0514)  
 ANTI-FLAG M2 Affinity Gel Sigma-Aldrich A2220  
 RNA Pol II (N20) Santa Cruz Biotechnology sc-899 (Lot# D2315)  
 HA Abcam ab9110(Lot#GR3177614-4)  
 AP2y(H-77) Santa Cruz Biotechnology sc-8977 (Lot#G1112)  
 GATA3(HG3-31) Santa Cruz Biotechnology sc-268 (Lot#J0515)  
 CBP diagenode C15410224 (Lot#39721)

Rad21 Abcam ab992 (Lot# GR214359-8)  
 H3K27Ac Abcam ab4729 (Lot#GR288020-1)  
 Pol II diagenode C15200004 (Lot#001-11)  
 FoxA1 diagenode C15410231 (Lot#39435)  
 BRD4 diagenode C15410337 (Lot#A2710P)  
 SMC1 Bethyl Laboratories A300-055A (A302-055A-6)  
 CTCF diagenode C15410210 (Lot#A2359-0010)  
 H3K4me2 Abcam ab7766 (Lot#GR102810-4)  
 H3K9me3 Abcam ab8898(Lot#GR3217826-1)  
 PolII Ser2p Abcam ab5095(Lot#GR3225147-1)  
 H3K9me2 Cell Signaling 9753S(Lot# 4)  
 MED26 Bethyl A302-371A (Lot#A302-371A-1)  
 Med26 (13641S, Cell Signaling)  
 Top1 Bethyl A302-589A (Lot#A302-589A-1)  
 Top1cc TopoGEN TG2017-2 (Lot# 17AG15)  
 Ku70 Santa Cruz Biotechnology sc-9033 (Lot#B0416)  
 Ku-80 MyBioSource MBS8533127 (Lot#T14S11)  
 Anti-HP1g, clone 42s2 Millipore 05-690 (Lot#3224566)  
 Ku70 Bethyl A302-624A (Lot#A302-624A-1)  
 H3K4me3 Abcam Ab8580(Lot#GR3201182-1)  
 CTCF Active Motif 61311(Lot#34614003)  
 Guinea Pig anti-Rabbit IgG Antibodies-online.com ABIN101961(43047)  
 Anti-Mouse IgG Millipore 06-371(Lot#3257057)

## Validation

ERα (HC20) Santa Cruz Biotechnology sc-543 (Lot# I0514) IDENTIFIER: RRID:AB\_631471  
 ANTI-FLAG M2 Affinity Gel Sigma-Aldrich A2220 IDENTIFIER: RRID:AB\_10063035  
 RNA Pol II (N20) Santa Cruz Biotechnology sc-899 (Lot# D2315) IDENTIFIER: RRID:AB\_632359  
 HA Abcam ab9110(Lot#GR3177614-4) IDENTIFIER: RRID:AB\_307019  
 AP2γ(H-77) Santa Cruz Biotechnology sc-8977 (Lot#G1112) IDENTIFIER: RRID:AB\_2286995  
 GATA3(HG3-31) Santa Cruz Biotechnology sc-268 (Lot#J0515) IDENTIFIER: RRID:AB\_2108591  
 CBP diagenode C15410224 (Lot#39721) IDENTIFIER: RRID:AB\_2722552  
 Rad21 Abcam ab992 (Lot# GR214359-8) IDENTIFIER: RRID:AB\_2314019  
 H3K27Ac Abcam ab4729 (Lot#GR288020-1) IDENTIFIER: RRID:AB\_2118291  
 Pol II diagenode C15200004 (Lot#001-11) IDENTIFIER: RRID:AB\_2728744  
 FoxA1 diagenode C15410231 (Lot#39435) Applications: Western Blot (WB), Immunofluorescence (IF), Immunoprecipitation (IP), ChIP/ChIP-seq, Immunohistochemistry.  
 BRD4 diagenode C15410337 (Lot#A2710P) Applications: Western Blot (WB), ELISA, ChIP/ChIP-seq.  
 SMC1 Bethyl Laboratories A300-055A (A302-055A-6) IDENTIFIER: RRID:AB\_2192467  
 CTCF diagenode C15410210 (Lot#A2359-0010) IDENTIFIER: RRID:AB\_2753160  
 H3K4me2 Abcam ab7766 (Lot#GR102810-4) IDENTIFIER: RRID:AB\_2560996  
 H3K9me3 Abcam ab8898 (Lot#GR3217826-1) IDENTIFIER: RRID:AB\_306848  
 PolII Ser2p Abcam ab5095 (Lot#GR3225147-1) IDENTIFIER: RRID:AB\_304749  
 H3K9me2 Cell Signaling 9753S (Lot# 4) IDENTIFIER: RRID:AB\_659848  
 MED26 Bethyl A302-371A (Lot#A302-371A-1) IDENTIFIER: RRID:AB\_1907254  
 MED26 Abcam Ab50619 IDENTIFIER: RRID:AB\_869274  
 MED26 (13641S, Cell Signaling) IDENTIFIER: RRID: AB\_2798281  
 Top1 Bethyl A302-589A (Lot#A302-589A-1) IDENTIFIER: RRID:AB\_2034865  
 Top1cc TopoGEN TG2017-2 (Lot# 17AG15) Applications: Western Blot (WB), ICE blot. CUT&RUN are validated in Fig.1.  
 Ku70 Santa Cruz Biotechnology sc-9033 (Lot#B0416) IDENTIFIER: RRID:AB\_650476  
 Ku-80 MyBioSource MBS8533127 (Lot#T14S11) Applications: Western Blot (WB), Immunofluorescence (IF), Immunoprecipitation (IP), ChIP/ChIP-seq.  
 Anti-HP1g, clone 42s2 Millipore 05-690 (Lot#3224566) IDENTIFIER: RRID:AB\_309910)  
 Ku70 Bethyl A302-624A (Lot#A302-624A-1) IDENTIFIER: RRID:AB\_10554672  
 H3K4me3 Abcam qb8580 (Lot#GR3201182-1) IDENTIFIER: RRID:AB\_306649  
 CTCF Active Motif 61311 (Lot#34614003) IDENTIFIER: RRID:AB\_61311  
 Guinea Pig anti-Rabbit IgG Antibodies-online.com ABIN101961(43047) IDENTIFIER: RRID:AB\_10775589  
 Anti-Mouse IgG Millipore 06-371(Lot#3257057) IDENTIFIER: RRID:AB\_390146

## Eukaryotic cell lines

Policy information about [cell lines](#)

|                                                                   |                                                                                                                                                      |
|-------------------------------------------------------------------|------------------------------------------------------------------------------------------------------------------------------------------------------|
| Cell line source(s)                                               | MCF7, 293T and LNCAP cells                                                                                                                           |
| Authentication                                                    | short tandem repeat (STR) was employed to determine the authentication.                                                                              |
| Mycoplasma contamination                                          | Mycoplasma contamination test was performed every 3 months for the all the MCF7, 293T and LNCAP cells used in our lab to make sure no contamination. |
| Commonly misidentified lines (See <a href="#">ICLAC</a> register) | N/A                                                                                                                                                  |

## Data deposition

- Confirm that both raw and final processed data have been deposited in a public database such as [GEO](#).
- Confirm that you have deposited or provided access to graph files (e.g. BED files) for the called peaks.

## Data access links

*May remain private before publication.*

<https://www.ncbi.nlm.nih.gov/geo/query/acc.cgi?acc=GSE135808>

## Files in database submission

AP2y\_E2.fastq.gz  
 AP2y\_Veh.fastq.gz  
 BRD4\_E2\_exp1.fastq.gz  
 BRD4\_E2\_exp2.fastq.gz  
 BRD4\_Veh\_exp1.fastq.gz  
 BRD4\_Veh\_exp2.fastq.gz  
 CBP\_E2.fastq.gz  
 CBP\_Veh.fastq.gz  
 CBX3\_siNC\_E2.fastq.gz  
 CBX3\_siNC\_Veh.fastq.gz  
 CBX3\_siTop1\_E2.fastq.gz  
 CTCF\_E2.fastq.gz  
 ERa\_E2.fastq.gz  
 ERa\_Veh.fastq.gz  
 FoxA1\_E2.fastq.gz  
 FoxA1\_Veh.fastq.gz  
 Gata3\_E2.fastq.gz  
 Gata3\_Veh.fastq.gz  
 H3K27Ac\_E2.fastq.gz  
 H3K27Ac\_Veh.fastq.gz  
 H3K4me3\_E2.fastq.gz  
 H3K4me3\_Veh.fastq.gz  
 H3K9me3\_E2.fastq.gz  
 H3K9me3\_Veh.fastq.gz  
 MED1\_siCbx3\_E2.fastq.gz  
 MED1\_siCbx3\_Veh.fastq.gz  
 MED1\_siNC\_E2.fastq.gz  
 MED1\_siNC\_Veh.fastq.gz  
 MED26\_siCbx3\_E2.fastq.gz  
 MED26\_siCbx3\_Veh.fastq.gz  
 MED26\_siNC\_E2.fastq.gz  
 MED26\_siNC\_Veh.fastq.gz  
 NCAPG\_E2.fastq.gz  
 NCAPG\_Veh.fastq.gz  
 PolIIser2P\_shMed26\_1\_E2.fastq.gz  
 PolIIser2P\_shMed26\_1\_Veh.fastq.gz  
 PolIIser2P\_shMed26\_2\_E2.fastq.gz  
 PolIIser2P\_shMed26\_2\_Veh.fastq.gz  
 PolIIser2P\_shscramble\_E2.fastq.gz  
 PolIIser2P\_shscramble\_Veh.fastq.gz  
 PolII\_shMed26\_1\_E2.fastq.gz  
 PolII\_shMed26\_1\_Veh.fastq.gz  
 PolII\_shMed26\_2\_E2.fastq.gz  
 PolII\_shMed26\_2\_Veh.fastq.gz  
 PolII\_shscramble\_E2.fastq.gz  
 PolII\_shscramble\_Veh.fastq.gz  
 PolII\_siCbx3\_DHT\_LNCAP.fastq.gz  
 PolII\_siCbx3\_E2\_MCF7.fastq.gz  
 PolII\_siCbx3\_Veh\_MCF7.fastq.gz  
 PolII\_siNC\_DHT\_LNCAP.fastq.gz  
 PolII\_siNC\_E2\_MCF7.fastq.gz  
 PolII\_siNC\_Veh\_LNCAP.fastq.gz  
 PolII\_siNC\_Veh\_MCF7.fastq.gz  
 Rad21\_E2.fastq.gz  
 Rad21\_Veh.fastq.gz  
 Smc1\_E2.fastq.gz  
 Smc1\_Veh.fastq.gz  
 AP2y\_E2.bed  
 AP2y\_Veh.bed  
 BRD4\_E2\_exp1.bed  
 BRD4\_E2\_exp2.bed  
 BRD4\_Veh\_exp1.bed  
 BRD4\_Veh\_exp2.bed

CBP\_E2.bed  
CBP\_Veh.bed  
CBX3\_siNC\_E2.bed  
CBX3\_siNC\_Veh.bed  
CBX3\_siTop1\_E2.bed  
CBX3\_siTop1\_Veh.bed  
CTCF\_E2.bed  
CTCF\_Veh.bed  
ERa\_E2.bed  
ERa\_Veh.bed  
FoxA1\_E2.bed  
FoxA1\_Veh.bed  
Gata3\_E2.bed  
Gata3\_Veh.bed  
H3K27Ac\_E2.bed  
H3K27Ac\_Veh.bed  
H3K4me3\_E2.bed  
H3K4me3\_Veh.bed  
H3K9me3\_E2.bed  
H3K9me3\_Veh.bed  
MED1\_siCbx3\_E2.bed  
MED1\_siCbx3\_Veh.bed  
MED1\_siNC\_E2.bed  
MED1\_siNC\_Veh.bed  
MED26\_siCbx3\_E2.bed  
MED26\_siCbx3\_Veh.bed  
MED26\_siNC\_E2.bed  
MED26\_siNC\_Veh.bed  
NCAPG\_E2.bed  
NCAPG\_Veh.bed  
PolIIser2P\_shMed26\_1\_E2.bed  
PolIIser2P\_shMed26\_1\_Veh.bed  
PolIIser2P\_shMed26\_2\_E2.bed  
PolIIser2P\_shMed26\_2\_Veh.bed  
PolIIser2P\_shscramble\_E2.bed  
PolIIser2P\_shscramble\_Veh.bed  
PolII\_shMed26\_1\_E2.bed  
PolII\_shMed26\_1\_Veh.bed  
PolII\_shMed26\_2\_E2.bed  
PolII\_shMed26\_2\_Veh.bed  
PolII\_shscramble\_E2.bed  
PolII\_shscramble\_Veh.bed  
PolII\_siCbx3\_DHT\_LNCAP.bed  
PolII\_siCbx3\_E2\_MCF7.bed  
PolII\_siCbx3\_Veh\_MCF7.bed  
PolII\_siNC\_DHT\_LNCAP.bed  
PolII\_siNC\_E2\_MCF7.bed  
PolII\_siNC\_Veh\_LNCAP.bed  
PolII\_siNC\_Veh\_MCF7.bed  
Rad21\_E2.bed  
Rad21\_Veh.bed  
Smc1\_E2.bed  
Smc1\_Veh.bed  
AP2y\_E2.ucsc.bigWig  
AP2y\_Veh.ucsc.bigWig  
BRD4\_E2\_exp1.ucsc.bigWig  
BRD4\_E2\_exp2.ucsc.bigWig  
BRD4\_Veh\_exp1.ucsc.bigWig  
BRD4\_Veh\_exp2.ucsc.bigWig  
CBP\_E2.ucsc.bigWig  
CBP\_Veh.ucsc.bigWig  
CBX3\_siNC\_E2.ucsc.bigWig  
CBX3\_siNC\_Veh.ucsc.bigWig  
CBX3\_siTop1\_E2.ucsc.bigWig  
CBX3\_siTop1\_Veh.ucsc.bigWig  
CTCF\_E2.ucsc.bigWig  
CTCF\_Veh.ucsc.bigWig  
ERa\_E2.ucsc.bigWig  
ERa\_Veh.ucsc.bigWig  
FoxA1\_E2.ucsc.bigWig  
FoxA1\_Veh.ucsc.bigWig  
Gata3\_E2.ucsc.bigWig  
Gata3\_Veh.ucsc.bigWig  
H3K27Ac\_E2.ucsc.bigWig  
H3K27Ac\_Veh.ucsc.bigWig  
H3K4me3\_E2.ucsc.bigWig

H3K4me3\_Veh.ucsc.bigWig  
H3K9me3\_E2.ucsc.bigWig  
H3K9me3\_Veh.ucsc.bigWig  
MED1\_siCbx3\_E2.ucsc.bigWig  
MED1\_siCbx3\_Veh.ucsc.bigWig  
MED1\_siNC\_E2.ucsc.bigWig  
MED1\_siNC\_Veh.ucsc.bigWig  
MED26\_siCbx3\_E2.ucsc.bigWig  
MED26\_siCbx3\_Veh.ucsc.bigWig  
MED26\_siNC\_E2.ucsc.bigWig  
MED26\_siNC\_Veh.ucsc.bigWig  
NCAPG\_E2.ucsc.bigWig  
NCAPG\_Veh.ucsc.bigWig  
PolIIser2P\_shMed26\_1\_E2.ucsc.bigWig  
PolIIser2P\_shMed26\_1\_Veh.ucsc.bigWig  
PolIIser2P\_shMed26\_2\_E2.ucsc.bigWig  
PolIIser2P\_shMed26\_2\_Veh.ucsc.bigWig  
PolIIser2P\_shscramble\_E2.ucsc.bigWig  
PolIIser2P\_shscramble\_Veh.ucsc.bigWig  
PolII\_shMed26\_1\_E2.ucsc.bigWig  
PolII\_shMed26\_1\_Veh.ucsc.bigWig  
PolII\_shMed26\_2\_E2.ucsc.bigWig  
PolII\_shMed26\_2\_Veh.ucsc.bigWig  
PolII\_shscramble\_E2.ucsc.bigWig  
PolII\_shscramble\_Veh.ucsc.bigWig  
PolIII\_siCbx3\_DHT\_LNCAP.ucsc.bigWig  
PolIII\_siCbx3\_E2\_MCF7.ucsc.bigWig  
PolIII\_siCbx3\_Veh\_MCF7.ucsc.bigWig  
PolIII\_siNC\_DHT\_LNCAP.ucsc.bigWig  
PolIII\_siNC\_E2\_MCF7.ucsc.bigWig  
PolIII\_siNC\_Veh\_LNCAP.ucsc.bigWig  
PolIII\_siNC\_Veh\_MCF7.ucsc.bigWig  
Rad21\_E2.ucsc.bigWig  
Rad21\_Veh.ucsc.bigWig  
Smc1\_E2.ucsc.bigWig  
Smc1\_Veh.ucsc.bigWig  
H3K27ac\_KCl\_0min\_R1\_001.fastq.gz  
H3K27ac\_KCl\_0min\_R2\_001.fastq.gz  
H3K27ac\_KCl\_15min\_R1\_001.fastq.gz  
H3K27ac\_KCl\_15min\_R2\_001.fastq.gz  
H3K27ac\_KCl\_30min\_R1\_001.fastq.gz  
H3K27ac\_KCl\_30min\_R2\_001.fastq.gz  
H3K27ac\_KCl\_60min\_R1\_001.fastq.gz  
H3K27ac\_KCl\_60min\_R2\_001.fastq.gz  
H3K27me3\_KCl\_0min\_exp1.fastq.gz  
H3K27me3\_KCl\_0min\_exp2.fastq.gz  
HP1g\_KCl\_0min\_exp2\_R1\_001.fastq.gz  
HP1g\_KCl\_0min\_exp2\_R2\_001.fastq.gz  
HP1g\_KCl\_0min\_R1\_001.fastq.gz  
HP1g\_KCl\_0min\_R2\_001.fastq.gz  
HP1g\_KCl\_15min\_R1\_001.fastq.gz  
HP1g\_KCl\_15min\_R2\_001.fastq.gz  
HP1g\_KCl\_30min\_exp2\_R1\_001.fastq.gz  
HP1g\_KCl\_30min\_exp2\_R2\_001.fastq.gz  
HP1g\_KCl\_30min\_R1\_001.fastq.gz  
HP1g\_KCl\_30min\_R2\_001.fastq.gz  
IlgG\_KCl\_0min\_exp1.fastq.gz  
IlgG\_KCl\_0min\_exp2.fastq.gz  
Ku70\_KCl\_0min\_exp2\_R1\_001.fastq.gz  
Ku70\_KCl\_0min\_exp2\_R2\_001.fastq.gz  
Ku70\_KCl\_0min\_R1\_001.fastq.gz  
Ku70\_KCl\_0min\_R2\_001.fastq.gz  
Ku70\_KCl\_15min\_R1\_001.fastq.gz  
Ku70\_KCl\_15min\_R2\_001.fastq.gz  
Ku70\_KCl\_30min\_exp2\_R1\_001.fastq.gz  
Ku70\_KCl\_30min\_exp2\_R2\_001.fastq.gz  
Ku70\_KCl\_30min\_R1\_001.fastq.gz  
Ku70\_KCl\_30min\_R2\_001.fastq.gz  
PolIII\_KCl\_0min\_exp2\_R1\_001.fastq.gz  
PolIII\_KCl\_0min\_exp2\_R2\_001.fastq.gz  
PolIII\_KCl\_0min\_R1\_001.fastq.gz  
PolIII\_KCl\_0min\_R2\_001.fastq.gz  
PolIII\_KCl\_15min\_R1\_001.fastq.gz  
PolIII\_KCl\_15min\_R2\_001.fastq.gz  
PolIII\_KCl\_180min\_exp2\_R1\_001.fastq.gz  
PolIII\_KCl\_180min\_exp2\_R2\_001.fastq.gz

PolII\_KCl\_30min\_R1\_001.fastq.gz  
PolII\_KCl\_30min\_R2\_001.fastq.gz  
PolII\_KCl\_60min\_R1\_001.fastq.gz  
PolII\_KCl\_60min\_R2\_001.fastq.gz  
Topo1cc\_KCl\_0min\_exp2\_R1\_001.fastq.gz  
Topo1cc\_KCl\_0min\_exp2\_R2\_001.fastq.gz  
Topo1cc\_KCl\_0min\_R1\_001.fastq.gz  
Topo1cc\_KCl\_0min\_R2\_001.fastq.gz  
Topo1cc\_KCl\_15min\_R1\_001.fastq.gz  
Topo1cc\_KCl\_15min\_R2\_001.fastq.gz  
Topo1cc\_KCl\_30min\_exp2\_R1\_001.fastq.gz  
Topo1cc\_KCl\_30min\_exp2\_R2\_001.fastq.gz  
Topo1cc\_KCl\_30min\_R1\_001.fastq.gz  
Topo1cc\_KCl\_30min\_R2\_001.fastq.gz  
H3K27me3\_Veh\_exp3\_R1\_001.fastq.gz  
H3K27me3\_Veh\_exp3\_R2\_001.fastq.gz  
H3K27me3\_Veh\_LNCAP\_R1\_001.fastq.gz  
H3K27me3\_Veh\_LNCAP\_R2\_001.fastq.gz  
HP1g\_DHT\_60min\_LNCAP\_exp1\_R1\_001.fastq.gz  
HP1g\_DHT\_60min\_LNCAP\_exp1\_R2\_001.fastq.gz  
HP1g\_DHT\_60min\_LNCAP\_exp2\_R1\_001.fastq.gz  
HP1g\_DHT\_60min\_LNCAP\_exp2\_R2\_001.fastq.gz  
HP1g\_E2\_14h\_exp4\_R1\_001.fastq.gz  
HP1g\_E2\_14h\_exp4\_R2\_001.fastq.gz  
HP1g\_E2\_1h\_exp4\_R1\_001.fastq.gz  
HP1g\_E2\_1h\_exp4\_R2\_001.fastq.gz  
HP1g\_E2\_1h\_siKu70\_exp6\_R1\_001.fastq.gz  
HP1g\_E2\_1h\_siKu70\_exp6\_R2\_001.fastq.gz  
HP1g\_E2\_1h\_siNC\_exp6\_R1\_001.fastq.gz  
HP1g\_E2\_1h\_siNC\_exp6\_R2\_001.fastq.gz  
HP1g\_TNFa\_14h\_exp4\_R1\_001.fastq.gz  
HP1g\_TNFa\_14h\_exp4\_R2\_001.fastq.gz  
HP1g\_TNFa\_1h\_exp4\_R1\_001.fastq.gz  
HP1g\_TNFa\_1h\_exp4\_R2\_001.fastq.gz  
HP1g\_Veh\_exp4\_R1\_001.fastq.gz  
HP1g\_Veh\_exp4\_R2\_001.fastq.gz  
HP1g\_Veh\_LNCAP\_exp1\_R1\_001.fastq.gz  
HP1g\_Veh\_LNCAP\_exp1\_R2\_001.fastq.gz  
HP1g\_Veh\_LNCAP\_exp2\_R1\_001.fastq.gz  
HP1g\_Veh\_LNCAP\_exp2\_R2\_001.fastq.gz  
HP1g\_Veh\_siKu70\_exp6\_R1\_001.fastq.gz  
HP1g\_Veh\_siKu70\_exp6\_R2\_001.fastq.gz  
HP1g\_Veh\_siNC\_exp6\_R1\_001.fastq.gz  
HP1g\_Veh\_siNC\_exp6\_R2\_001.fastq.gz  
IgG\_Veh\_exp3\_R1\_001.fastq.gz  
IgG\_Veh\_exp3\_R2\_001.fastq.gz  
IgG\_Veh\_exp4\_R1\_001.fastq.gz  
IgG\_Veh\_exp4\_R2\_001.fastq.gz  
IgG\_Veh\_LNCAP\_R1\_001.fastq.gz  
IgG\_Veh\_LNCAP\_R2\_001.fastq.gz  
Ku70\_DHT\_60min\_LNCAP\_exp1\_R1\_001.fastq.gz  
Ku70\_DHT\_60min\_LNCAP\_exp1\_R2\_001.fastq.gz  
Ku70\_DHT\_60min\_LNCAP\_exp2\_R1\_001.fastq.gz  
Ku70\_DHT\_60min\_LNCAP\_exp2\_R2\_001.fastq.gz  
Ku70\_E2\_14h\_exp2\_R1\_001.fastq.gz  
Ku70\_E2\_14h\_exp2\_R2\_001.fastq.gz  
Ku70\_TNFa\_14h\_exp2\_R1\_001.fastq.gz  
Ku70\_TNFa\_14h\_exp2\_R2\_001.fastq.gz  
Ku70\_TNFa\_1h\_exp2\_R1\_001.fastq.gz  
Ku70\_TNFa\_1h\_exp2\_R2\_001.fastq.gz  
Ku70\_Veh\_exp2\_R1\_001.fastq.gz  
Ku70\_Veh\_exp2\_R2\_001.fastq.gz  
Ku70\_Veh\_LNCAP\_exp1\_R1\_001.fastq.gz  
Ku70\_Veh\_LNCAP\_exp1\_R2\_001.fastq.gz  
Ku70\_Veh\_LNCAP\_exp2\_R1\_001.fastq.gz  
Ku70\_Veh\_LNCAP\_exp2\_R2\_001.fastq.gz  
Topo1cc\_DHT\_60min\_LNCAP\_exp1\_R1\_001.fastq.gz  
Topo1cc\_DHT\_60min\_LNCAP\_exp1\_R2\_001.fastq.gz  
Topo1cc\_DHT\_60min\_LNCAP\_exp2\_R1\_001.fastq.gz  
Topo1cc\_DHT\_60min\_LNCAP\_exp2\_R2\_001.fastq.gz  
Topo1cc\_E2\_14h\_exp4\_R1\_001.fastq.gz  
Topo1cc\_E2\_14h\_exp4\_R2\_001.fastq.gz  
Topo1cc\_Veh\_exp4\_R1\_001.fastq.gz  
Topo1cc\_Veh\_exp4\_R2\_001.fastq.gz  
Topo1cc\_Veh\_LNCAP\_exp1\_R1\_001.fastq.gz  
Topo1cc\_Veh\_LNCAP\_exp1\_R2\_001.fastq.gz

Topo1cc\_Veh\_LNCAP\_exp2\_R1\_001.fastq.gz  
Topo1cc\_Veh\_LNCAP\_exp2\_R2\_001.fastq.gz  
Topo1\_E2\_14h\_exp3\_R1\_001.fastq.gz  
Topo1\_E2\_14h\_exp3\_R2\_001.fastq.gz  
Topo1\_E2\_1h\_exp3\_R1\_001.fastq.gz  
Topo1\_E2\_1h\_exp3\_R2\_001.fastq.gz  
Topo1\_Veh\_exp3\_R1\_001.fastq.gz  
Topo1\_Veh\_exp3\_R2\_001.fastq.gz  
Gata3\_E2\_1h\_siHP1g\_exp2.fastq.gz  
Gata3\_E2\_1h\_siNC\_exp2.fastq.gz  
Gata3\_Veh\_siHP1g\_exp2.fastq.gz  
Gata3\_Veh\_siNC\_exp2.fastq.gz  
HP1g\_E2\_14h\_exp2.fastq.gz  
HP1g\_E2\_14h\_exp3.fastq.gz  
HP1g\_E2\_1h\_exp2.fastq.gz  
HP1g\_E2\_1h\_exp3.fastq.gz  
HP1g\_E2\_1h\_siKu70\_exp5.fastq.gz  
HP1g\_E2\_1h\_siNC\_exp5.fastq.gz  
HP1gS83A\_E2\_1h\_exp1.fastq.gz  
HP1gS83A\_E2\_1h\_exp2.fastq.gz  
HP1gS83D\_E2\_1h\_exp1.fastq.gz  
HP1gS83D\_E2\_1h\_exp2.fastq.gz  
HP1g\_Veh\_exp2.fastq.gz  
HP1g\_Veh\_exp3.fastq.gz  
HP1g\_Veh\_siKu70\_exp5.fastq.gz  
HP1g\_Veh\_siNC\_exp5.fastq.gz  
Ku70\_E2\_1h\_exp1.fastq.gz  
Ku70\_E2\_1h\_exp3.fastq.gz  
Ku70\_Veh\_exp1.fastq.gz  
Ku70\_Veh\_exp3.fastq.gz  
Ku80\_E2\_1h\_exp3.fastq.gz  
Ku80\_Veh\_exp3.fastq.gz  
Topo1cc\_E2\_1h\_exp1.fastq.gz  
Topo1cc\_E2\_1h\_exp2.fastq.gz  
Topo1cc\_Veh\_exp1.fastq.gz  
Topo1cc\_Veh\_exp2.fastq.gz  
H3K27ac\_KCl\_0min.ucsc.bedGraph.gz  
H3K27ac\_KCl\_15min.ucsc.bedGraph.gz  
H3K27ac\_KCl\_30min.ucsc.bedGraph.gz  
H3K27ac\_KCl\_60min.ucsc.bedGraph.gz  
H3K27me3\_KCl\_0min\_exp1.ucsc.bedGraph.gz  
H3K27me3\_KCl\_0min\_exp2.ucsc.bedGraph.gz  
HP1g\_KCl\_0min\_exp2.ucsc.bedGraph.gz  
HP1g\_KCl\_0min.ucsc.bedGraph.gz  
HP1g\_KCl\_15min.ucsc.bedGraph.gz  
HP1g\_KCl\_30min\_exp2.ucsc.bedGraph.gz  
HP1g\_KCl\_30min.ucsc.bedGraph.gz  
IlgG\_KCl\_0min\_exp1.ucsc.bedGraph.gz  
IlgG\_KCl\_0min\_exp2.ucsc.bedGraph.gz  
Ku70\_KCl\_0min\_exp2.ucsc.bedGraph.gz  
Ku70\_KCl\_0min.ucsc.bedGraph.gz  
Ku70\_KCl\_15min.ucsc.bedGraph.gz  
Ku70\_KCl\_30min\_exp2.ucsc.bedGraph.gz  
Ku70\_KCl\_30min.ucsc.bedGraph.gz  
PolII\_KCl\_0min\_exp2.ucsc.bedGraph.gz  
PolII\_KCl\_0min.ucsc.bedGraph.gz  
PolII\_KCl\_15min.ucsc.bedGraph.gz  
PolII\_KCl\_180min\_exp2.ucsc.bedGraph.gz  
PolII\_KCl\_30min.ucsc.bedGraph.gz  
PolII\_KCl\_60min.ucsc.bedGraph.gz  
Topo1cc\_KCl\_0min\_exp2.ucsc.bedGraph.gz  
Topo1cc\_KCl\_0min.ucsc.bedGraph.gz  
Topo1cc\_KCl\_15min.ucsc.bedGraph.gz  
Topo1cc\_KCl\_30min\_exp2.ucsc.bedGraph.gz  
Topo1cc\_KCl\_30min.ucsc.bedGraph.gz  
H3K27ac\_KCl\_0min.bed  
H3K27ac\_KCl\_15min.bed  
H3K27ac\_KCl\_30min.bed  
H3K27ac\_KCl\_60min.bed  
H3K27me3\_KCl\_0min\_exp1.bed  
H3K27me3\_KCl\_0min\_exp2.bed  
HP1g\_KCl\_0min.bed  
HP1g\_KCl\_0min\_exp2.bed  
HP1g\_KCl\_15min.bed  
HP1g\_KCl\_30min.bed  
HP1g\_KCl\_30min\_exp2.bed



IgG\_KCl\_0min\_exp1.bed  
IgG\_KCl\_0min\_exp2.bed  
Ku70\_KCl\_0min.bed  
Ku70\_KCl\_0min\_exp2.bed  
Ku70\_KCl\_15min.bed  
Ku70\_KCl\_30min.bed  
Ku70\_KCl\_30min\_exp2.bed  
PolII\_KCl\_0min.bed  
PolII\_KCl\_0min\_exp2.bed  
PolII\_KCl\_15min.bed  
PolII\_KCl\_180min\_exp2.bed  
PolII\_KCl\_30min.bed  
PolII\_KCl\_60min.bed  
Topo1cc\_KCl\_0min.bed  
Topo1cc\_KCl\_0min\_exp2.bed  
Topo1cc\_KCl\_15min.bed  
Topo1cc\_KCl\_30min.bed  
Topo1cc\_KCl\_30min\_exp2.bed  
Gata3\_E2\_1h\_siHP1g\_exp2.bed  
Gata3\_E2\_1h\_siHP1g\_exp2.fastq.gz  
Gata3\_E2\_1h\_siHP1g\_exp2.ucsc.bedGraph.gz  
Gata3\_E2\_1h\_siNC\_exp2.bed  
Gata3\_E2\_1h\_siNC\_exp2.fastq.gz  
Gata3\_E2\_1h\_siNC\_exp2.ucsc.bedGraph.gz  
Gata3\_Veh\_siHP1g\_exp2.bed  
Gata3\_Veh\_siHP1g\_exp2.fastq.gz  
Gata3\_Veh\_siHP1g\_exp2.ucsc.bedGraph.gz  
Gata3\_Veh\_siNC\_exp2.bed  
Gata3\_Veh\_siNC\_exp2.fastq.gz  
Gata3\_Veh\_siNC\_exp2.ucsc.bedGraph.gz  
HP1g\_E2\_14h\_exp2.bed  
HP1g\_E2\_14h\_exp2.fastq.gz  
HP1g\_E2\_14h\_exp2.ucsc.bedGraph.gz  
HP1g\_E2\_14h\_exp3.bed  
HP1g\_E2\_14h\_exp3.fastq.gz  
HP1g\_E2\_14h\_exp3.ucsc.bedGraph.gz  
HP1g\_E2\_1h\_exp2.bed  
HP1g\_E2\_1h\_exp2.fastq.gz  
HP1g\_E2\_1h\_exp2.ucsc.bedGraph.gz  
HP1g\_E2\_1h\_exp3.bed  
HP1g\_E2\_1h\_exp3.fastq.gz  
HP1g\_E2\_1h\_exp3.ucsc.bedGraph.gz  
HP1g\_E2\_1h\_siKu70\_exp5.bed  
HP1g\_E2\_1h\_siKu70\_exp5.fastq.gz  
HP1g\_E2\_1h\_siKu70\_exp5.ucsc.bedGraph.gz  
HP1g\_E2\_1h\_siNC\_exp5.bed  
HP1g\_E2\_1h\_siNC\_exp5.fastq.gz  
HP1g\_E2\_1h\_siNC\_exp5.ucsc.bedGraph.gz  
HP1gS83A\_E2\_1h\_exp1.bed  
HP1gS83A\_E2\_1h\_exp1.fastq.gz  
HP1gS83A\_E2\_1h\_exp1.ucsc.bedGraph.gz  
HP1gS83A\_E2\_1h\_exp2.bed  
HP1gS83A\_E2\_1h\_exp2.fastq.gz  
HP1gS83A\_E2\_1h\_exp2.ucsc.bedGraph.gz  
HP1gS83D\_E2\_1h\_exp1.bed  
HP1gS83D\_E2\_1h\_exp1.fastq.gz  
HP1gS83D\_E2\_1h\_exp1.ucsc.bedGraph.gz  
HP1gS83D\_E2\_1h\_exp2.bed  
HP1gS83D\_E2\_1h\_exp2.fastq.gz  
HP1gS83D\_E2\_1h\_exp2.ucsc.bedGraph.gz  
HP1g\_Veh\_exp2.bed  
HP1g\_Veh\_exp2.fastq.gz  
HP1g\_Veh\_exp2.ucsc.bedGraph.gz  
HP1g\_Veh\_exp3.bed  
HP1g\_Veh\_exp3.fastq.gz  
HP1g\_Veh\_exp3.ucsc.bedGraph.gz  
HP1g\_Veh\_siKu70\_exp5.bed  
HP1g\_Veh\_siKu70\_exp5.fastq.gz  
HP1g\_Veh\_siKu70\_exp5.ucsc.bedGraph.gz  
HP1g\_Veh\_siNC\_exp5.bed  
HP1g\_Veh\_siNC\_exp5.fastq.gz  
HP1g\_Veh\_siNC\_exp5.ucsc.bedGraph.gz  
Ku70\_E2\_1h\_exp1.bed  
Ku70\_E2\_1h\_exp1.fastq.gz  
Ku70\_E2\_1h\_exp1.ucsc.bedGraph.gz  
Ku70\_E2\_1h\_exp3.bed

Ku70\_E2\_1h\_exp3.fastq.gz  
Ku70\_E2\_1h\_exp3.ucsc.bedGraph.gz  
Ku70\_Veh\_exp1.bed  
Ku70\_Veh\_exp1.fastq.gz  
Ku70\_Veh\_exp1.ucsc.bedGraph.gz  
Ku70\_Veh\_exp3.bed  
Ku70\_Veh\_exp3.fastq.gz  
Ku70\_Veh\_exp3.ucsc.bedGraph.gz  
Ku80\_E2\_1h\_exp3.bed  
Ku80\_E2\_1h\_exp3.fastq.gz  
Ku80\_E2\_1h\_exp3.ucsc.bedGraph.gz  
Ku80\_Veh\_exp3.bed  
Ku80\_Veh\_exp3.fastq.gz  
Ku80\_Veh\_exp3.ucsc.bedGraph.gz  
Topo1cc\_E2\_1h\_exp1.bed  
Topo1cc\_E2\_1h\_exp1.fastq.gz  
Topo1cc\_E2\_1h\_exp1.ucsc.bedGraph.gz  
Topo1cc\_E2\_1h\_exp2.bed  
Topo1cc\_E2\_1h\_exp2.fastq.gz  
Topo1cc\_E2\_1h\_exp2.ucsc.bedGraph.gz  
Topo1cc\_Veh\_exp1.bed  
Topo1cc\_Veh\_exp1.fastq.gz  
Topo1cc\_Veh\_exp1.ucsc.bedGraph.gz  
Topo1cc\_Veh\_exp2.bed  
Topo1cc\_Veh\_exp2.fastq.gz  
Topo1cc\_Veh\_exp2.ucsc.bedGraph.gz  
H3K27me3\_Veh\_exp3.bed  
H3K27me3\_Veh\_exp3\_R1\_001.fastq.gz  
H3K27me3\_Veh\_exp3\_R2\_001.fastq.gz  
H3K27me3\_Veh\_exp3.ucsc.bedGraph.gz  
H3K27me3\_Veh\_LNCAP.bed  
H3K27me3\_Veh\_LNCAP\_R1\_001.fastq.gz  
H3K27me3\_Veh\_LNCAP\_R2\_001.fastq.gz  
H3K27me3\_Veh\_LNCAP.ucsc.bedGraph.gz  
HP1g\_DHT\_60min\_LNCAP\_exp1.bed  
HP1g\_DHT\_60min\_LNCAP\_exp1\_R1\_001.fastq.gz  
HP1g\_DHT\_60min\_LNCAP\_exp1\_R2\_001.fastq.gz  
HP1g\_DHT\_60min\_LNCAP\_exp1.ucsc.bedGraph.gz  
HP1g\_DHT\_60min\_LNCAP\_exp2.bed  
HP1g\_DHT\_60min\_LNCAP\_exp2\_R1\_001.fastq.gz  
HP1g\_DHT\_60min\_LNCAP\_exp2\_R2\_001.fastq.gz  
HP1g\_DHT\_60min\_LNCAP\_exp2.ucsc.bedGraph.gz  
HP1g\_E2\_14h\_exp4.bed  
HP1g\_E2\_14h\_exp4\_R1\_001.fastq.gz  
HP1g\_E2\_14h\_exp4\_R2\_001.fastq.gz  
HP1g\_E2\_14h\_exp4.ucsc.bedGraph.gz  
HP1g\_E2\_1h\_exp4.bed  
HP1g\_E2\_1h\_exp4\_R1\_001.fastq.gz  
HP1g\_E2\_1h\_exp4\_R2\_001.fastq.gz  
HP1g\_E2\_1h\_exp4.ucsc.bedGraph.gz  
HP1g\_E2\_1h\_siKu70\_exp6.bed  
HP1g\_E2\_1h\_siKu70\_exp6\_R1\_001.fastq.gz  
HP1g\_E2\_1h\_siKu70\_exp6\_R2\_001.fastq.gz  
HP1g\_E2\_1h\_siKu70\_exp6.ucsc.bedGraph.gz  
HP1g\_E2\_1h\_siNC\_exp6.bed  
HP1g\_E2\_1h\_siNC\_exp6\_R1\_001.fastq.gz  
HP1g\_E2\_1h\_siNC\_exp6\_R2\_001.fastq.gz  
HP1g\_E2\_1h\_siNC\_exp6.ucsc.bedGraph.gz  
HP1g\_TNFa\_14h\_exp4.bed  
HP1g\_TNFa\_14h\_exp4\_R1\_001.fastq.gz  
HP1g\_TNFa\_14h\_exp4\_R2\_001.fastq.gz  
HP1g\_TNFa\_1h\_exp4.bed  
HP1g\_TNFa\_1h\_exp4\_R1\_001.fastq.gz  
HP1g\_TNFa\_1h\_exp4\_R2\_001.fastq.gz  
HP1g\_TNFa\_1h\_exp4.ucsc.bedGraph.gz  
HP1g\_Veh\_exp4.bed  
HP1g\_Veh\_exp4\_R1\_001.fastq.gz  
HP1g\_Veh\_exp4\_R2\_001.fastq.gz  
HP1g\_Veh\_exp4.ucsc.bedGraph.gz  
HP1g\_Veh\_LNCAP\_exp1.bed  
HP1g\_Veh\_LNCAP\_exp1\_R1\_001.fastq.gz  
HP1g\_Veh\_LNCAP\_exp1\_R2\_001.fastq.gz  
HP1g\_Veh\_LNCAP\_exp1.ucsc.bedGraph.gz  
HP1g\_Veh\_LNCAP\_exp2.bed  
HP1g\_Veh\_LNCAP\_exp2\_R1\_001.fastq.gz  
HP1g\_Veh\_LNCAP\_exp2\_R2\_001.fastq.gz

HP1g\_Veh\_LNCAP\_exp2.ucsc.bedGraph.gz  
HP1g\_Veh\_siKu70\_exp6.bed  
HP1g\_Veh\_siKu70\_exp6\_R1\_001.fastq.gz  
HP1g\_Veh\_siKu70\_exp6\_R2\_001.fastq.gz  
HP1g\_Veh\_siKu70\_exp6.ucsc.bedGraph.gz  
HP1g\_Veh\_siNC\_exp6.bed  
HP1g\_Veh\_siNC\_exp6\_R1\_001.fastq.gz  
HP1g\_Veh\_siNC\_exp6\_R2\_001.fastq.gz  
HP1g\_Veh\_siNC\_exp6.ucsc.bedGraph.gz  
Ilg\_Veh\_exp4.bed  
Ilg\_Veh\_exp4\_R1\_001.fastq.gz  
Ilg\_Veh\_exp4\_R2\_001.fastq.gz  
Ilg\_Veh\_exp4.ucsc.bedGraph.gz  
Ilg\_Veh\_LNCAP.bed  
Ilg\_Veh\_LNCAP\_R1\_001.fastq.gz  
Ilg\_Veh\_LNCAP\_R2\_001.fastq.gz  
Ilg\_Veh\_LNCAP.ucsc.bedGraph.gz  
Ku70\_DHT\_60min\_LNCAP\_exp1.bed  
Ku70\_DHT\_60min\_LNCAP\_exp1\_R1\_001.fastq.gz  
Ku70\_DHT\_60min\_LNCAP\_exp1\_R2\_001.fastq.gz  
Ku70\_DHT\_60min\_LNCAP\_exp1.ucsc.bedGraph.gz  
Ku70\_DHT\_60min\_LNCAP\_exp2.bed  
Ku70\_DHT\_60min\_LNCAP\_exp2\_R1\_001.fastq.gz  
Ku70\_DHT\_60min\_LNCAP\_exp2\_R2\_001.fastq.gz  
Ku70\_DHT\_60min\_LNCAP\_exp2.ucsc.bedGraph.gz  
Ku70\_E2\_14h\_exp2.bed  
Ku70\_E2\_14h\_exp2\_R1\_001.fastq.gz  
Ku70\_E2\_14h\_exp2\_R2\_001.fastq.gz  
Ku70\_E2\_14h\_exp2.ucsc.bedGraph.gz  
Ku70\_TNFa\_14h\_exp2.bed  
Ku70\_TNFa\_14h\_exp2\_R1\_001.fastq.gz  
Ku70\_TNFa\_14h\_exp2\_R2\_001.fastq.gz  
Ku70\_TNFa\_14h\_exp2.ucsc.bedGraph.gz  
Ku70\_TNFa\_1h\_exp2.bed  
Ku70\_TNFa\_1h\_exp2\_R1\_001.fastq.gz  
Ku70\_TNFa\_1h\_exp2\_R2\_001.fastq.gz  
Ku70\_TNFa\_1h\_exp2.ucsc.bedGraph.gz  
Ku70\_Veh\_exp2.bed  
Ku70\_Veh\_exp2\_R1\_001.fastq.gz  
Ku70\_Veh\_exp2\_R2\_001.fastq.gz  
Ku70\_Veh\_exp2.ucsc.bedGraph.gz  
Ku70\_Veh\_LNCAP\_exp1.bed  
Ku70\_Veh\_LNCAP\_exp1\_R1\_001.fastq.gz  
Ku70\_Veh\_LNCAP\_exp1\_R2\_001.fastq.gz  
Ku70\_Veh\_LNCAP\_exp1.ucsc.bedGraph.gz  
Ku70\_Veh\_LNCAP\_exp2.bed  
Ku70\_Veh\_LNCAP\_exp2\_R1\_001.fastq.gz  
Ku70\_Veh\_LNCAP\_exp2\_R2\_001.fastq.gz  
Ku70\_Veh\_LNCAP\_exp2.ucsc.bedGraph.gz  
Topo1cc\_DHT\_60min\_LNCAP\_exp1.bed  
Topo1cc\_DHT\_60min\_LNCAP\_exp1\_R1\_001.fastq.gz  
Topo1cc\_DHT\_60min\_LNCAP\_exp1\_R2\_001.fastq.gz  
Topo1cc\_DHT\_60min\_LNCAP\_exp1.ucsc.bedGraph.gz  
Topo1cc\_DHT\_60min\_LNCAP\_exp2.bed  
Topo1cc\_DHT\_60min\_LNCAP\_exp2\_R1\_001.fastq.gz  
Topo1cc\_DHT\_60min\_LNCAP\_exp2\_R2\_001.fastq.gz  
Topo1cc\_DHT\_60min\_LNCAP\_exp2.ucsc.bedGraph.gz  
Topo1cc\_E2\_14h\_exp4.bed  
Topo1cc\_E2\_14h\_exp4\_R1\_001.fastq.gz  
Topo1cc\_E2\_14h\_exp4\_R2\_001.fastq.gz  
Topo1cc\_E2\_14h\_exp4.ucsc.bedGraph.gz  
Topo1cc\_Veh\_exp4.bed  
Topo1cc\_Veh\_exp4\_R1\_001.fastq.gz  
Topo1cc\_Veh\_exp4\_R2\_001.fastq.gz  
Topo1cc\_Veh\_exp4.ucsc.bedGraph.gz  
Topo1cc\_Veh\_LNCAP\_exp1.bed  
Topo1cc\_Veh\_LNCAP\_exp1\_R1\_001.fastq.gz  
Topo1cc\_Veh\_LNCAP\_exp1\_R2\_001.fastq.gz  
Topo1cc\_Veh\_LNCAP\_exp1.ucsc.bedGraph.gz  
Topo1cc\_Veh\_LNCAP\_exp2.bed  
Topo1cc\_Veh\_LNCAP\_exp2\_R1\_001.fastq.gz  
Topo1cc\_Veh\_LNCAP\_exp2\_R2\_001.fastq.gz  
Topo1cc\_Veh\_LNCAP\_exp2.ucsc.bedGraph.gz  
Topo1\_E2\_14h\_exp3.bed  
Topo1\_E2\_14h\_exp3\_R1\_001.fastq.gz  
Topo1\_E2\_14h\_exp3\_R2\_001.fastq.gz

Topo1\_E2\_14h\_exp3.ucsc.bedGraph.gz  
 Topo1\_E2\_1h\_exp3.bed  
 Topo1\_E2\_1h\_exp3\_R1\_001.fastq.gz  
 Topo1\_E2\_1h\_exp3\_R2\_001.fastq.gz  
 Topo1\_E2\_1h\_exp3.ucsc.bedGraph.gz  
 Topo1\_Veh\_exp3.bed  
 Topo1\_Veh\_exp3\_R1\_001.fastq.gz  
 Topo1\_Veh\_exp3\_R2\_001.fastq.gz  
 Topo1\_Veh\_exp3.ucsc.bedGraph.gz

Genome browser session  
 (e.g. [UCSC](#))

For human cancer cell data:  
[http://genome.ucsc.edu/s/yuliangtan/Topo1cc\\_hg38](http://genome.ucsc.edu/s/yuliangtan/Topo1cc_hg38)

For cortical neuron data:  
[http://genome.ucsc.edu/s/yuliangtan/Topo1cc\\_mm10](http://genome.ucsc.edu/s/yuliangtan/Topo1cc_mm10)

## Methodology

Replicates

All experiments were replicated at least twice.

Sequencing depth

At least 30, 000,000 reads were detected at most of the sequencing data.

Antibodies

ER $\alpha$  (HC20) Santa Cruz Biotechnology sc-543 (Lot# I0514)  
 RNA Pol II (N20) Santa Cruz Biotechnology sc-899 (Lot# D2315)  
 AP2 $\gamma$ (H-77) Santa Cruz Biotechnology sc-8977 (Lot#G1112)  
 GATA3(HG3-31) Santa Cruz Biotechnology sc-268 (Lot#J0515)  
 CBP diagenode C15410224 (Lot#39721)  
 Rad21 Abcam ab992 (Lot# GR214359-8)  
 H3K27Ac Abcam ab4729 (Lot#GR288020-1)  
 Pol II diagenode C15200004 (Lot#001-11)  
 FoxA1 diagenode C15410231 (Lot#39435)  
 BRD4 diagenode C15410337 (Lot#A2710P)  
 SMC1 Bethyl Laboratories A300-055A (A302-055A-6)  
 H3K4me2 Abcam ab7766 (Lot#GR102810-4)  
 H3K9me3 Abcam ab8898(Lot#GR3217826-1)  
 PolII Ser2p Abcam ab5095(Lot#GR3225147-1)  
 H3K9me2 Cell Signaling 9753S(Lot# 4)  
 MED26 (13641S, Cell Signaling)  
 TOP1 Bethyl A302-589A (Lot#A302-589A-1)  
 TOP1cc TopoGEN TG2017-2 (Lot# 17AG15)  
 Ku-80 MyBioSource MBS8533127 (Lot#T14S11)  
 Anti-HP1g, clone 42s2 Millipore 05-690 (Lot#3224566)  
 Ku70 Bethyl A302-624A (Lot#A302-624A-1)  
 H3K4me3 Abcam Ab8580(Lot#GR3201182-1)  
 CTCF Active Motif 61311(Lot#34614003)

Peak calling parameters

For TFs: findPeaks -style factor -o auto  
 For histones: findPeaks -style histone -o auto

Data quality

# maximum tags considered per bp = 1.0  
 # effective number of tags used for normalization = 10000000.0  
 # Peaks have been centered at maximum tag pile-up  
 # FDR rate threshold = 0.001000000  
 # FDR tag threshold = 20.0  
 # size of region used for local filtering = 10000  
 # Fold over local region required = 4.00  
 # Poisson p-value over local region required = 1.00e-04  
 # Maximum fold under expected unique positions for tags = 2.00  
 # Putative peaks filtered for being too clonal = 0

Software

DNA sequences generated by the Illumina Pipeline were aligned to the human genome (hg38) or mouse genome (mm10) assembly using Bowtie2. The data were visualized by preparing custom tracks on the University of California, Santa Cruz (UCSC) genome browser using HOMER software package. Clustering plots for normalized tag densities at each genomic region were generated using HOMER and then clustered using Gene Cluster 3.0 and visualized using Java TreeView. Sequence logos were generated using WebLOGO. Gene ontology analysis was performed with Metascape. The overlaps between sites identified in CHIP-seq for DNA-binding proteins and TOP1cc signals were calculated using BEDTools.
