# Supplementary material for: Signal-induced enhancer activation requires Ku70 to read topoisomerase1–DNA covalent complexes
Source: PubMed Central journal article supplement (PMC9935399; doi:10.1038/s41594-022-00883-8), 2023-02-06

Fig.1b

|                         | ATAC  | SMC1  | RAD21 | CTCF | H3K4me3 | H3K9me3 | H3K27Ac | H3K4me2 | H3K27me3 | H2Az | H4K16Ac | H4K20me1 |
|-------------------------|-------|-------|-------|------|---------|---------|---------|---------|----------|------|---------|----------|
| Numbers of TOP1cc Peaks | 12451 | 10922 | 9036  | 4694 | 6331    | 896     | 15103   | 14488   | 253      | 9995 | 13326   | 1097     |

Fig.1d

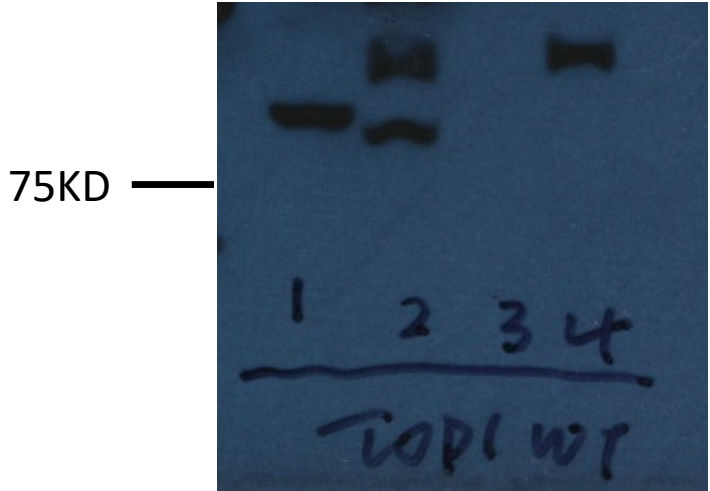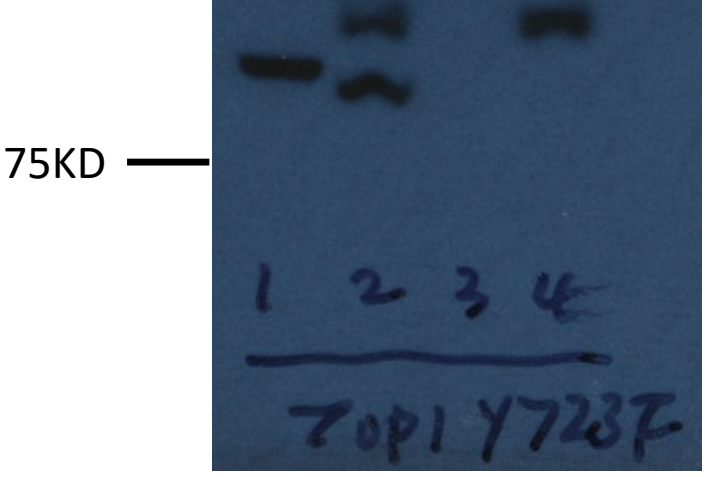

- 1: CTRL gRNA DOX -
- 2: CTRL gRNA DOX +
- 3: Top1 gRNA DOX -
- 4: Top1 gRNA DOX +

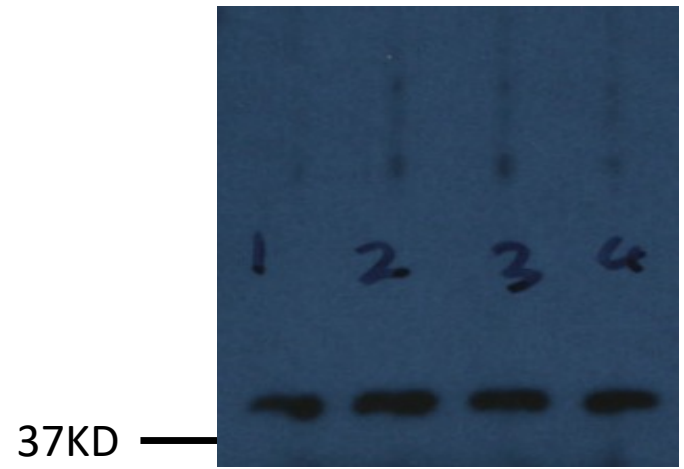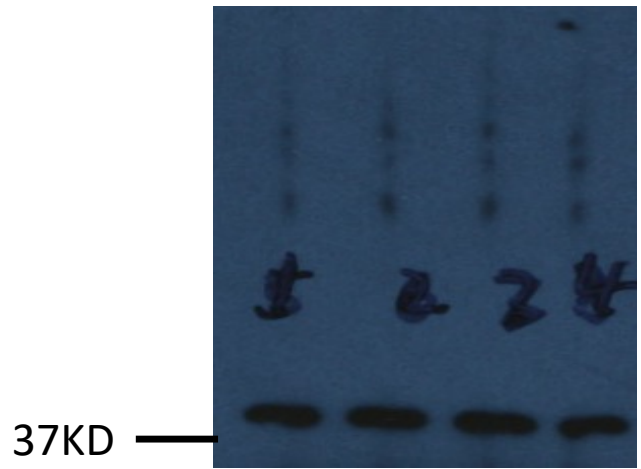

Supplement: 41594_2022_883_MOESM4_ESM.pdf [file 41594_2022_883_MOESM4_ESM.pdf]
