# Supplementary material for: Signal-induced enhancer activation requires Ku70 to read topoisomerase1–DNA covalent complexes
Source: PubMed Central journal article supplement (PMC9935399; doi:10.1038/s41594-022-00883-8), 2023-02-06
Supplement: 41594_2022_883_MOESM5_ESM.pdf [file 41594_2022_883_MOESM5_ESM.pdf]

Fig.2c

|                          |         |           |         |         |           |         |         |                     |         |         |                     |         |  |
|--------------------------|---------|-----------|---------|---------|-----------|---------|---------|---------------------|---------|---------|---------------------|---------|--|
| Tff1<br>enhancer<br>RNA  |         | Ctrl gRNA |         |         | Top1 gRNA |         |         | Ctrl gRNA+TOP1wt    |         |         | Top1p gRNA+TOP1wt   |         |  |
| Veh                      | 30.7434 | 30.3447   | 30.0745 | 30.0988 | 30.1051   | 29.9699 | 31.5589 | 31.7392             | 31.3467 | 30.4551 | 30.0598             | 29.581  |  |
| E2                       | 27.7381 | 27.4425   | 27.257  | 30.3438 | 30.5551   | 29.8627 | 28.2824 | 28.8944             | 28.7488 | 28.3487 | 28.2801             | 28.6079 |  |
| Tff1<br>enhancer<br>RNA  |         | Ctrl gRNA |         |         | Top1 gRNA |         |         | Ctrl gRNA+TOP1Y723F |         |         | Top1 gRNA+TOP1Y723F |         |  |
| Veh                      | 31.0588 | 30.4115   | 31.1347 | 31.2679 | 30.2473   | 30.6532 | 30.3148 | 30.4984             | 29.4187 | 29.8362 | 29.792              | 29.7208 |  |
| E2                       | 27.6647 | 27.6716   | 27.9447 | 29.8459 | 29.9313   | 30.5178 | 28.9493 | 28.4241             | 28.1241 | 29.5582 | 30.0564             | 29.5668 |  |
| Greb1<br>enhancer<br>RNA |         | Ctrl gRNA |         |         | Top1 gRNA |         |         | Ctrl gRNA+TOP1wt    |         |         | Top1 gRNA+TOP1wt    |         |  |
| Veh                      | 29.5415 | 29.107    | 28.8297 | 30.2717 | 30.1076   | 29.8103 | 30.896  | 30.3272             | 30.3265 | 28.9953 | 29.3456             | 29.2663 |  |
| E2                       | 27.2226 | 27.249    | 27.1241 | 29.8072 | 30.8419   | 30.2547 | 27.8924 | 27.9434             | 28.3649 | 26.4636 | 26.415              | 26.0592 |  |
| Greb1<br>enhancer<br>RNA |         | Ctrl gRNA |         |         | Top1 gRNA |         |         | Ctrl gRNA+TOP1Y723F |         |         | Top1 gRNA+TOP1Y723F |         |  |
| Veh                      | 32.1317 | 31.4529   | 31.8146 | 31.5731 | 31.3059   | 31.6099 | 31.3371 | 31.877              | 30.4073 | 31.2756 | 30.9844             | 30.9309 |  |
| E2                       | 28.0093 | 27.4344   | 27.957  | 31.0692 | 30.9817   | 31.6685 | 28.8717 | 28.8548             | 28.2234 | 29.9076 | 29.8539             | 30.1048 |  |
| GAPDH WT                 |         | Ctrl gRNA |         |         | Top1 gRNA |         |         | Ctrl gRNA+TOP1wt    |         |         | Top1p gRNA+TOP1wt   |         |  |
| Veh                      | 19.8342 | 19.9367   | 19.8082 | 20.184  | 20.008    | 20.1231 | 21.3772 | 21.0674             | 21.3414 | 20.0013 | 19.7739             | 19.468  |  |
| E2                       | 20.1821 | 20.2778   | 20.2863 | 20.6566 | 20.5498   | 20.0617 | 20.9756 | 21.165              | 21.6533 | 19.3248 | 19.5798             | 19.3479 |  |
| GAPDH<br>Y723F           |         | Ctrl gRNA |         |         | Top1 gRNA |         |         | Ctrl gRNA+TOP1wt    |         |         | Top1p gRNA+TOP1wt   |         |  |
| Veh                      | 21.2214 | 21.0442   | 21.5489 | 21.6588 | 21.2092   | 21.7635 | 21.1557 | 21.2056             | 20.4022 | 20.8221 | 20.6991             | 20.8183 |  |
| E2                       | 20.4533 | 20.2698   | 20.9864 | 21.3825 | 20.9766   | 21.8679 | 21.5649 | 21.1253             | 21.128  | 20.884  | 21.1534             | 20.845  |  |

Fig.2e

|          |         |         |         |         |         |         |
|----------|---------|---------|---------|---------|---------|---------|
| FoxC1    | siNC    |         |         | siTop1  |         |         |
| Veh      | 29.6849 | 29.7959 | 28.8874 | 29.8454 | 29.5674 | 30.263  |
| E2       | 27.8247 | 28.3695 | 27.7598 | 29.2396 | 29.1515 | 29.6721 |
|          |         |         |         |         |         |         |
| Greb1    | siNC    |         |         | siTop1  |         |         |
| Veh      | 25.3366 | 25.9371 | 25.9712 | 25.6995 | 25.9119 | 26.1364 |
| Acute E2 | 23.8902 | 23.9549 | 23.868  | 25.5626 | 25.5441 | 25.583  |
|          |         |         |         |         |         |         |
| KCNK5    | siNC    |         |         | siTop1  |         |         |
| Veh      | 28.9357 | 29.4611 | 29.4995 | 29.1796 | 29.2502 | 29.4112 |
| Acute E2 | 25.1022 | 25.1451 | 25.1599 | 26.9462 | 27.7516 | 27.2649 |
|          |         |         |         |         |         |         |
| Nrip1    | siNC    |         |         | siTop1  |         |         |
| Veh      | 27.4841 | 27.9175 | 27.8048 | 27.6543 | 27.7772 | 27.6944 |
| Acute E2 | 26.5885 | 26.5946 | 26.5901 | 28.2988 | 28.0861 | 28.5658 |
|          |         |         |         |         |         |         |
| P2ry2    | siNC    |         |         | siTop1  |         |         |
| Veh      | 25.943  | 25.9357 | 25.8597 | 25.9353 | 26.0011 | 25.983  |
| Acute E2 | 24.6647 | 24.879  | 24.5725 | 26.4657 | 26.076  | 26.654  |
|          |         |         |         |         |         |         |
| Pgr      | siNC    |         |         | siTop1  |         |         |
| Veh      | 29.944  | 29.6732 | 29.9601 | 29.5249 | 29.3555 | 29.7054 |
| Acute E2 | 25.2472 | 25.6536 | 25.6112 | 27.4189 | 27.2161 | 27.785  |
|          |         |         |         |         |         |         |
| GAPDH    | siNC    |         |         | siTop1  |         |         |
| Veh      | 18.3460 | 18.4692 | 18.5924 | 19.2389 | 18.8266 | 18.4143 |
| Acute E2 | 19.5752 | 19.8070 | 20.0388 | 19.6882 | 19.4900 | 19.2918 |

Fig.2f

|       |         |         |         |         |         |         |  |
|-------|---------|---------|---------|---------|---------|---------|--|
| FoxC1 |         | siNC    |         |         | siTop1  |         |  |
| Veh   | 30.8060 | 30.3624 | 30.5947 | 30.9946 | 31.1628 | 31.0404 |  |
| E2    | 28.8686 | 28.9420 | 28.0666 | 28.7520 | 28.3115 | 28.9928 |  |
| Greb1 |         | siNC    |         |         | siTop1  |         |  |
| Veh   | 26.0103 | 26.5312 | 26.5033 | 27.1830 | 27.2081 | 27.4061 |  |
| E2    | 22.8415 | 22.1470 | 22.3874 | 22.5283 | 22.4862 | 22.7350 |  |
| KCNK5 | siNC    |         |         | siTop1  |         |         |  |
| Veh   | 27.9587 | 28.0875 | 28.0385 | 29.4933 | 29.1043 | 29.4735 |  |
| E2    | 24.5030 | 25.1303 | 24.7989 | 25.0030 | 25.7384 | 25.4085 |  |
| Nrip1 |         | siNC    |         |         | siTop1  |         |  |
| Veh   | 27.8245 | 27.8697 | 27.8074 | 27.9856 | 27.9506 | 28.0907 |  |
| E2    | 25.7532 | 26.1701 | 25.6988 | 25.7234 | 25.6770 | 26.0465 |  |
| P2ry2 |         | siNC    |         |         | siTop1  |         |  |
| Veh   | 26.0559 | 25.8524 | 25.6825 | 27.0265 | 27.0454 | 27.3733 |  |
| E2    | 26.2927 | 26.9815 | 26.9538 | 26.3202 | 26.0201 | 26.6523 |  |
| Pgr   |         | siNC    |         |         | siTop1  |         |  |
| Veh   | 24.3637 | 24.0588 | 24.3076 | 24.9678 | 26.8643 | 25.6161 |  |
| E2    | 24.1719 | 24.5601 | 24.3070 | 24.3382 | 24.1591 | 24.6665 |  |
| GAPDH |         | siNC    |         |         | siTop1  |         |  |
| Veh   | 19.5656 | 19.3852 | 19.4093 | 20.0169 | 19.9417 | 20.0111 |  |
| E2    | 19.6378 | 19.9172 | 19.5799 | 19.6193 | 19.5723 | 19.8028 |  |
