# Supplementary material for: Signal-induced enhancer activation requires Ku70 to read topoisomerase1–DNA covalent complexes
Source: PubMed Central journal article supplement (PMC9935399; doi:10.1038/s41594-022-00883-8), 2023-02-06

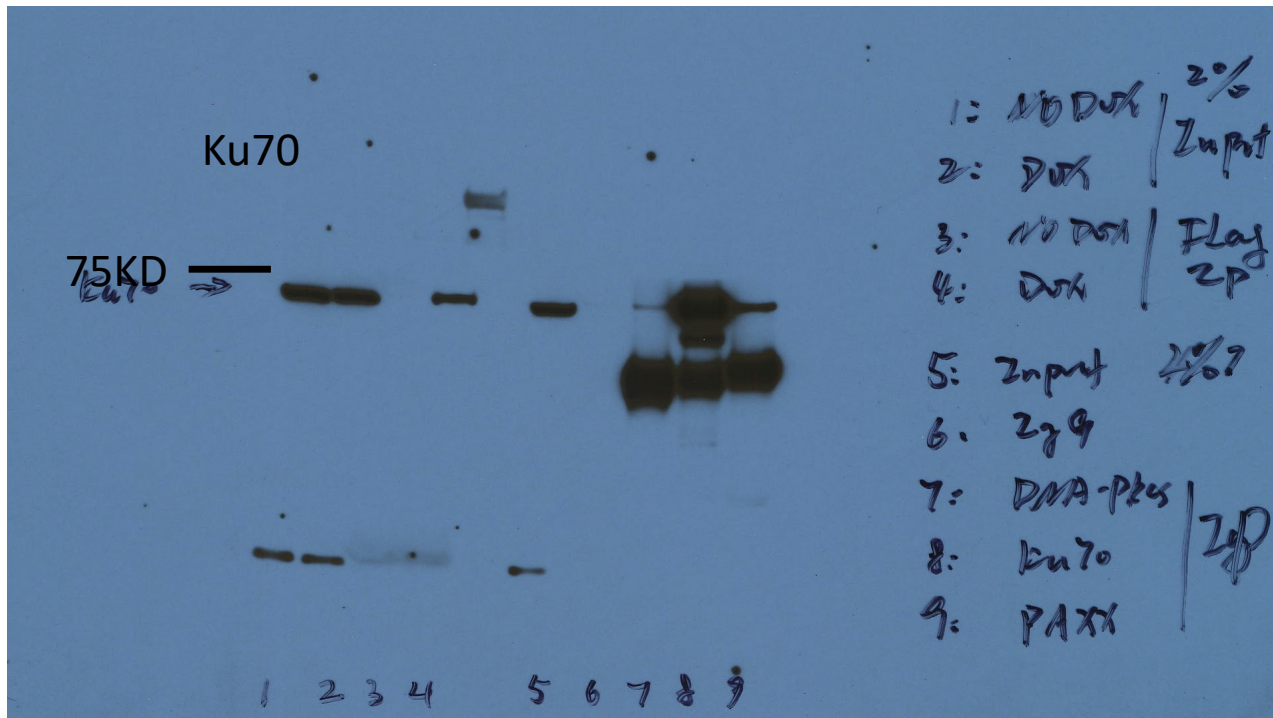

Fig.3b

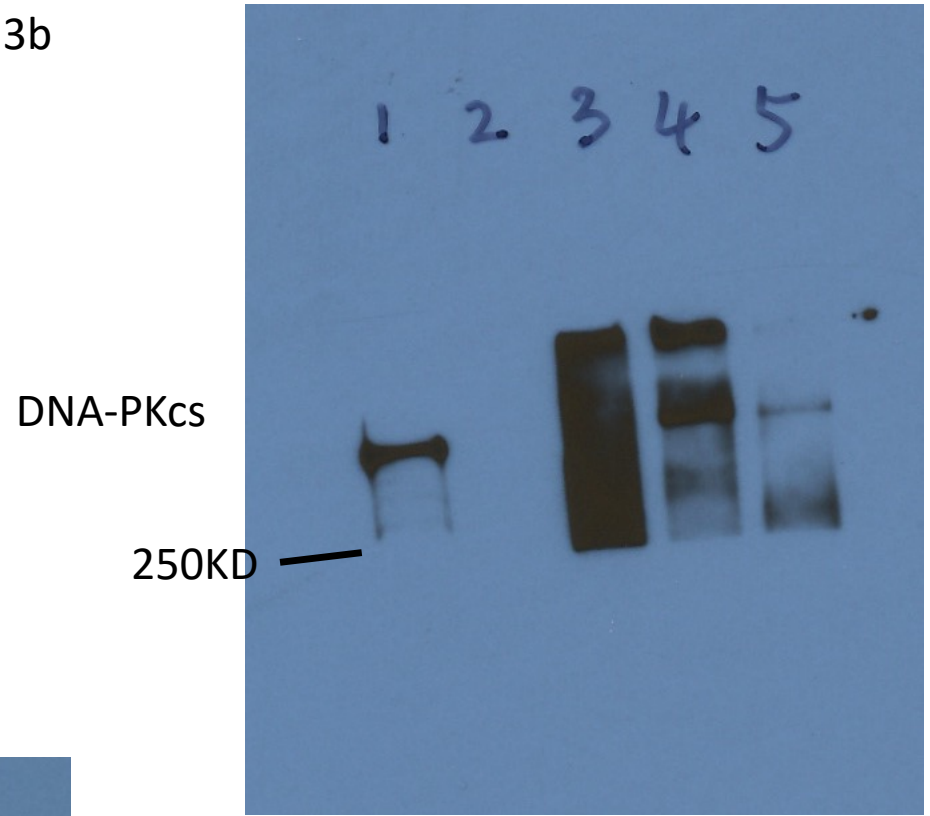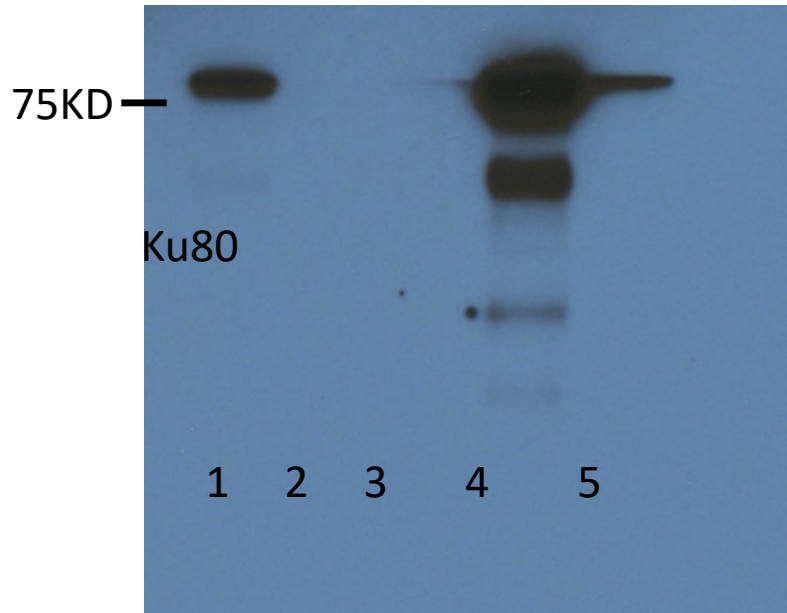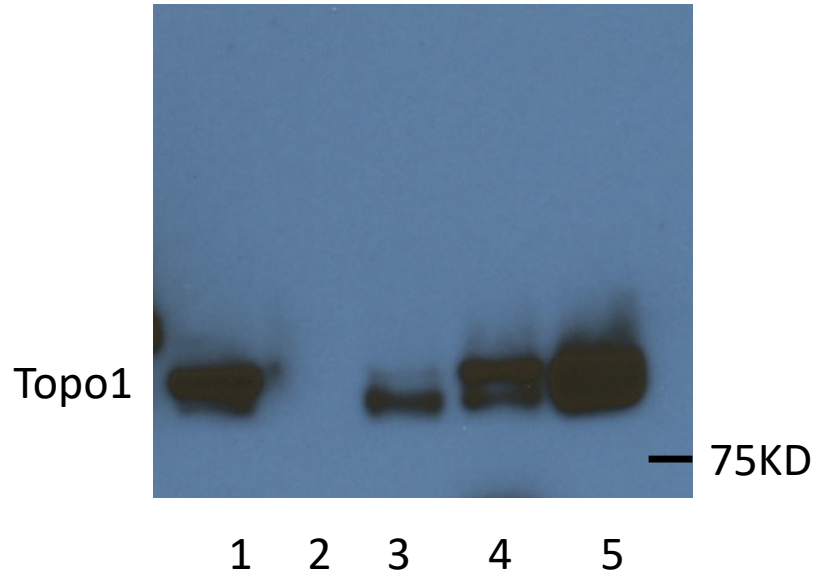

1: Input  
2: IgG IP  
3: DNA-PKcs IP  
4: Ku70 IP  
5: PAXX IP  
PAXX IP was not employed in this manuscript.

Fig.3e

Flga-Top1  
Top1

75KD —

1. 2. 3. 4. 5. 6.

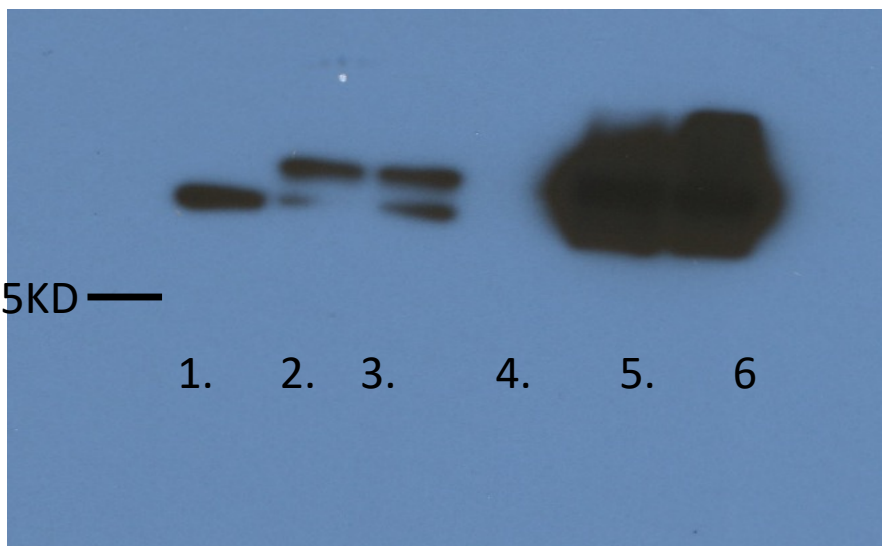

75KD —

Ku70 →

Fig3e

1 2 3 4 5 6

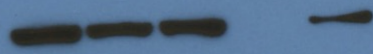

Input [ 1: No Ddx  
2: TOP1N + Ddx  
3: TOP1MN + Ddx  
Flag [ 4: No Ddx  
5: TOP1N  
6: TOP1MN

Fig.3f

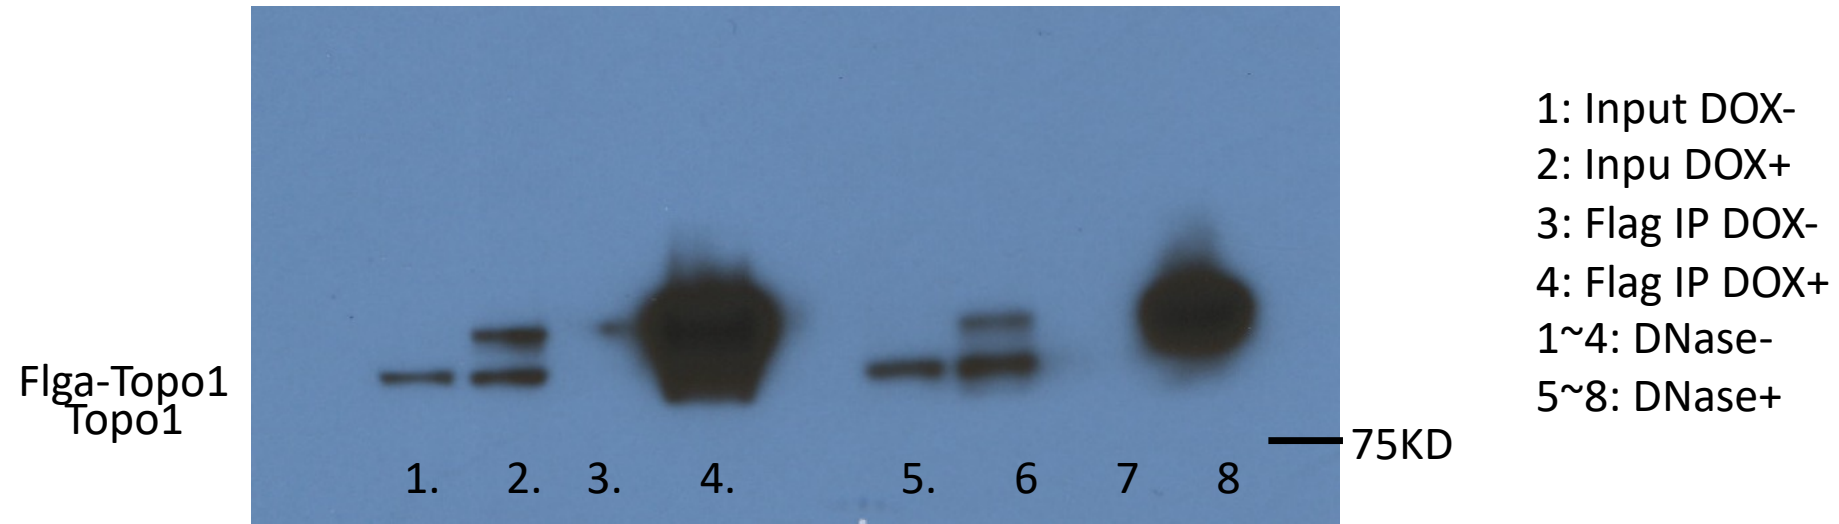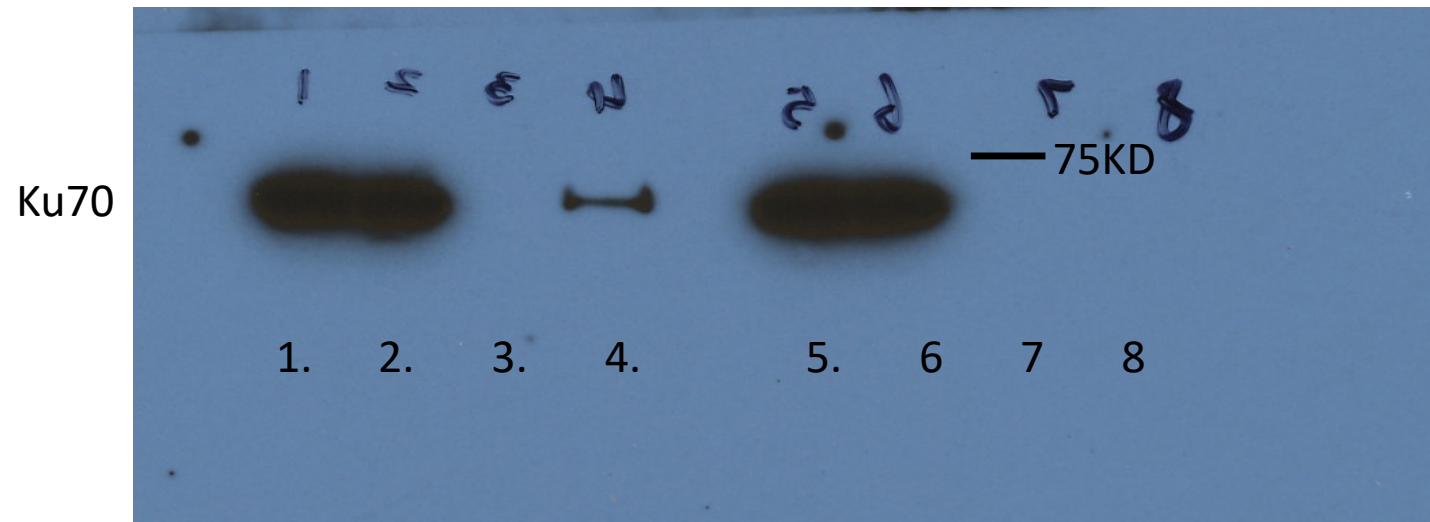

Supplement: 41594_2022_883_MOESM6_ESM.pdf [file 41594_2022_883_MOESM6_ESM.pdf]
