# Supplementary material for: Signal-induced enhancer activation requires Ku70 to read topoisomerase1–DNA covalent complexes
Source: PubMed Central journal article supplement (PMC9935399; doi:10.1038/s41594-022-00883-8), 2023-02-06
Supplement: 41594_2022_883_MOESM7_ESM.pdf [file 41594_2022_883_MOESM7_ESM.pdf]

Fig.3h

| Tff1e      | Veh     |         |         | E2      |         |         |
|------------|---------|---------|---------|---------|---------|---------|
| shScr      | 31.8143 | 31.4967 | 31.2519 | 27.9261 | 28.1227 | 28.1221 |
| shKu70     | 32.2257 | 31.1214 | 31.4835 | 30.0624 | 30.6331 | 30.5235 |
| shXRCC4    | 32.5831 | 32.5338 | 33.1285 | 29.5653 | 29.2727 | 29.5708 |
| shDNA-PKcs | 33.052  | 32.6681 | 32.3361 | 31.1024 | 31.6195 | 30.5451 |
| Greb1e     | Veh     |         |         | E2      |         |         |
| shScr      | 27.4643 | 26.8323 | 27.1907 | 24.0401 | 23.8902 | 23.751  |
| shKu70     | 26.9044 | 26.4366 | 26.7304 | 25.5864 | 25.6277 | 25.5593 |
| shXRCC4    | 27.5263 | 26.8499 | 28.0674 | 25.3453 | 25.2316 | 25.3664 |
| shDNA-PKcs | 28.4047 | 27.7524 | 27.5365 | 27.7412 | 26.2426 | 26.0034 |
| GAPDH      | Veh     |         |         | E2      |         |         |
| shScr      | 19.7345 | 19.0887 | 19.5347 | 18.4944 | 18.3485 | 18.5649 |
| shKu70     | 19.213  | 19.0036 | 19.4223 | 18.7529 | 18.9159 | 18.8111 |
| shXRCC4    | 19.6739 | 19.0731 | 20.0043 | 19.7873 | 19.6998 | 19.9339 |
| shDNA-PKcs | 20.5213 | 20.1374 | 19.8392 | 18.5528 | 18.4209 | 18.4963 |
