# Supplementary material for: Signal-induced enhancer activation requires Ku70 to read topoisomerase1–DNA covalent complexes
Source: PubMed Central journal article supplement (PMC9935399; doi:10.1038/s41594-022-00883-8), 2023-02-06
Supplement: 41594_2022_883_MOESM9_ESM.pdf [file 41594_2022_883_MOESM9_ESM.pdf]

Fig.5c--LNCAP

| Klk2        | Veh     |         |         | DHT     |         |         |
|-------------|---------|---------|---------|---------|---------|---------|
| siNC        | 30.8429 | 30.0779 | 30.8475 | 26.9292 | 26.7743 | 27.7502 |
| siTop1      | 30.7437 | 29.9154 | 29.4502 | 30.4851 | 30.6382 | 31.6751 |
| siKu70      | 31.2806 | 29.4497 | 30.3386 | 31.3249 | 30.681  | 30.5935 |
| siHP1g      | 31.2642 | 31.7862 | 31.1467 | 31.9324 | 30.9029 | 31.0302 |
|             |         |         |         |         |         |         |
| Klk3        | Veh     |         |         | DHT     |         |         |
| siNC        | 23.605  | 22.7684 | 23.4504 | 21.1788 | 20.5675 | 22.718  |
| siTop1      | 22.4749 | 23.3937 | 23.6831 | 23.8771 | 23.3746 | 23.8004 |
| siKu70      | 23.1014 | 22.0506 | 22.8434 | 23.6601 | 23.9575 | 23.7042 |
| siHP1g      | 22.5713 | 22.3234 | 22.7403 | 24.4293 | 23.8372 | 24.4099 |
|             |         |         |         |         |         |         |
| Tmprss2     | Veh     |         |         | DHT     |         |         |
| siNC        | 28.404  | 27.6966 | 27.4347 | 23.5563 | 23.3138 | 24.9179 |
| siTop1      | 27.0032 | 26.8498 | 27.4028 | 27.19   | 26.166  | 26.4029 |
| siKu70      | 27.4875 | 26.5725 | 27.1867 | 26.4167 | 26.8637 | 26.5071 |
| siHP1g      | 27.3213 | 26.9279 | 27.0986 | 26.2638 | 26.4952 | 26.4999 |
|             |         |         |         |         |         |         |
| GAPDH-LNCAP | Veh     |         |         | DHT     |         |         |
| siNC        | 19.8196 | 18.9167 | 19.3953 | 18.9494 | 18.6388 | 19.9525 |
| siTop1      | 19.0561 | 18.8619 | 19.3036 | 18.6527 | 18.4995 | 18.9603 |
| siKu70      | 19.5333 | 18.7427 | 19.3789 | 18.6662 | 18.8224 | 18.7280 |
| siHP1g      | 18.8148 | 18.6489 | 18.9697 | 18.6467 | 18.7492 | 18.8891 |

Fig.5c—MCF7

| IL6        | Veh     |         |         | TNFa    |         |         |
|------------|---------|---------|---------|---------|---------|---------|
| siNC       | 34.4491 | 33.1027 | 33.9605 | 31.2763 | 31.1291 | 32.5493 |
| siTop1     | 33.8697 | 33.9085 | 34.5056 | 32.5262 | 32.6892 | 33.6184 |
| siKu70     | 34.6893 | 33.0385 | 33.3569 | 33.0653 | 33.0635 | 32.9509 |
| siHP1g     | 35.163  | 35.8444 | 35.0157 | 33.6732 | 32.3675 | 32.7092 |
|            |         |         |         |         |         |         |
| IL8        | Veh     |         |         | TNFa    |         |         |
| siNC       | 32.5569 | 32.05   | 32.822  | 23.3704 | 23.2838 | 24.8641 |
| siTop1     | 32.0758 | 32.7941 | 33.4971 | 26.735  | 26.3687 | 26.5424 |
| siKu70     | 33.114  | 32.0081 | 33.0277 | 26.2184 | 26.2161 | 26.1375 |
| siHP1g     | 32.7965 | 33.593  | 34.0722 | 25.4579 | 25.0412 | 25.8382 |
|            |         |         |         |         |         |         |
| CCl2       | Veh     |         |         | TNFa    |         |         |
| siNC       | 32.3363 | 34.8167 | 32.7432 | 21.4828 | 21.2678 | 23.0206 |
| siTop1     | 31.851  | 31.8239 | 32.936  | 26.221  | 25.2572 | 25.2306 |
| siKu70     | 32.169  | 31.4085 | 32.7722 | 24.857  | 25.366  | 25.0335 |
| siHP1g     | 33.303  | 32.6807 | 32.4246 | 26.4084 | 26.4173 | 26.5838 |
|            |         |         |         |         |         |         |
| GAPDH-MCF7 | Veh     |         |         | TNFa    |         |         |
| siNC       | 20.0767 | 20.1183 | 20.5495 | 19.9805 | 19.4955 | 20.9685 |
| siTop1     | 20.1872 | 19.9482 | 20.7900 | 19.6630 | 19.5364 | 19.7924 |
| siKu70     | 20.7744 | 19.8908 | 20.6520 | 19.6975 | 19.9253 | 19.7205 |
| siHP1g     | 20.1602 | 20.0612 | 20.2494 | 19.6760 | 19.6165 | 19.8890 |
