# Supplementary material for: Signal-induced enhancer activation requires Ku70 to read topoisomerase1–DNA covalent complexes
Source: PubMed Central journal article supplement (PMC9935399; doi:10.1038/s41594-022-00883-8), 2023-02-06
Supplement: 41594_2022_883_MOESM11_ESM.pdf [file 41594_2022_883_MOESM11_ESM.pdf]

Extended Data Fig.5

|          |         |         |         |         |            |         |
|----------|---------|---------|---------|---------|------------|---------|
| DNA-PKcs |         | shTRC   |         |         | shDNA-PKcs |         |
| Veh      | 26.242  | 25.8439 | 25.8362 | 30.6601 | 30.011     | 30.2162 |
| E2       | 24.7328 | 24.7099 | 24.685  | 28.2436 | 28.3287    | 27.9441 |
|          |         |         |         |         |            |         |
| Ku70     |         | shTRC   |         |         | shKu70     |         |
| Veh      | 25.4949 | 24.8576 | 25.1883 | 28.2596 | 28.0842    | 28.1383 |
| E2       | 24.2142 | 23.9994 | 23.9469 | 27.7649 | 27.8376    | 27.2528 |
|          |         |         |         |         |            |         |
| XRCC4    |         | shTRC   |         |         | shXRCC4    |         |
| Veh      | 26.5881 | 26.1151 | 26.2192 | 30.2567 | 30.0858    | 30.3248 |
| E2       | 26.1592 | 25.8528 | 26.1737 | 30.6288 | 30.374     | 30.5167 |
|          |         |         |         |         |            |         |
| GAPDH    |         | shTRC   |         |         | shDNA-PKcs |         |
| Veh      | 19.7345 | 19.0887 | 19.5347 | 20.5213 | 20.1374    | 19.8392 |
| E2       | 18.4944 | 18.3485 | 18.5649 | 18.5528 | 18.4209    | 18.4963 |
|          |         |         |         |         |            |         |
| GAPDH    |         | shTRC   |         |         | shKu70     |         |
| Veh      | 19.7345 | 19.0887 | 19.5347 | 19.213  | 19.0036    | 19.4223 |
| E2       | 18.4944 | 18.3485 | 18.5649 | 18.7529 | 18.9159    | 18.8111 |
|          |         |         |         |         |            |         |
| GAPDH    |         | shTRC   |         |         | shXRCC4    |         |
| Veh      | 19.7345 | 19.0887 | 19.5347 | 19.6739 | 19.0731    | 20.0043 |
| E2       | 18.4944 | 18.3485 | 18.5649 | 19.7873 | 19.6998    | 19.9339 |
