# Supplementary material for: Signal-induced enhancer activation requires Ku70 to read topoisomerase1–DNA covalent complexes
Source: PubMed Central journal article supplement (PMC9935399; doi:10.1038/s41594-022-00883-8), 2023-02-06

Extended Data Fig.7a

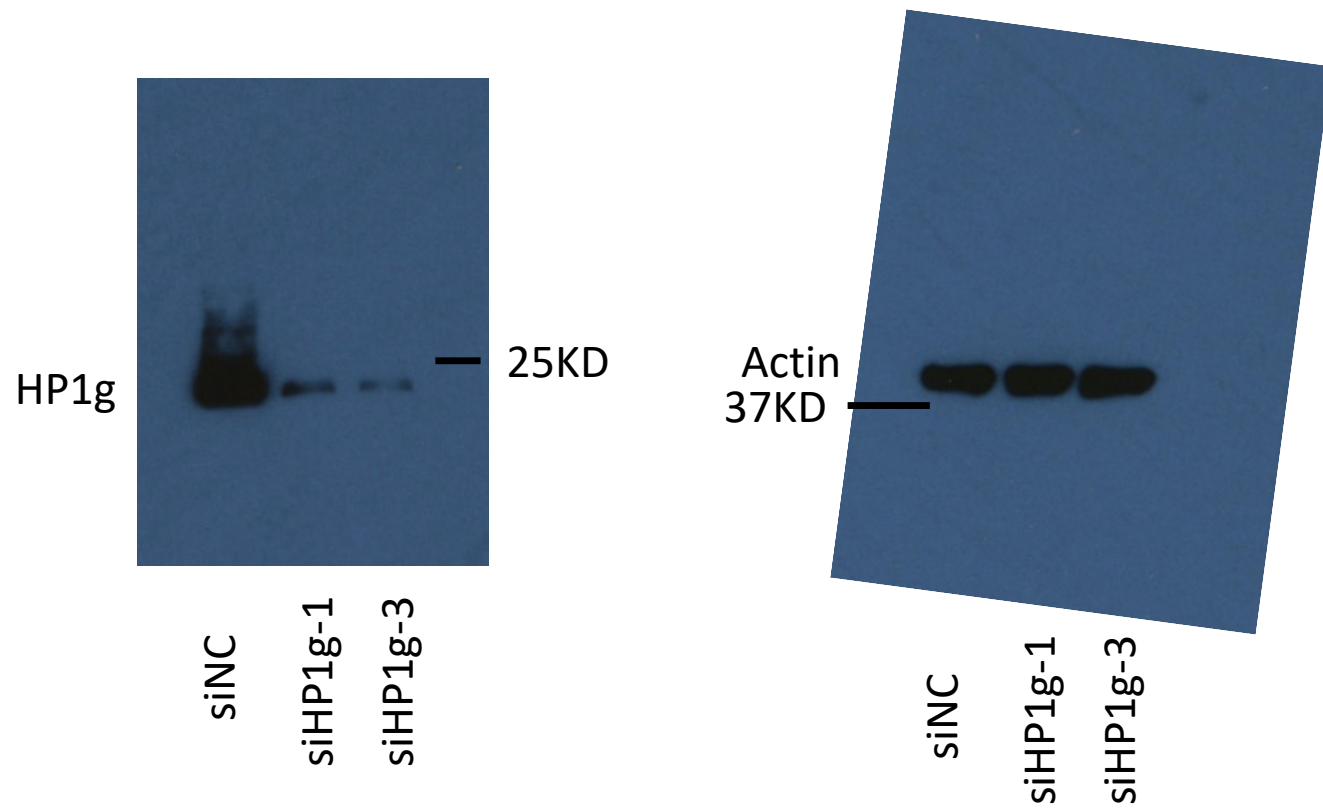

Supplement: 41594_2022_883_MOESM12_ESM.pdf [file 41594_2022_883_MOESM12_ESM.pdf]
